# Supplementary material
Source: Springer Nature journal article supplement (https://www.springermedizin.de/resource/supplementary/12877_2009_186_MOESM4_ESM.pdf/9441364)

**Control (Larvae on ETOH)**

**Experimental (Larvae on Drug)**

**Female**

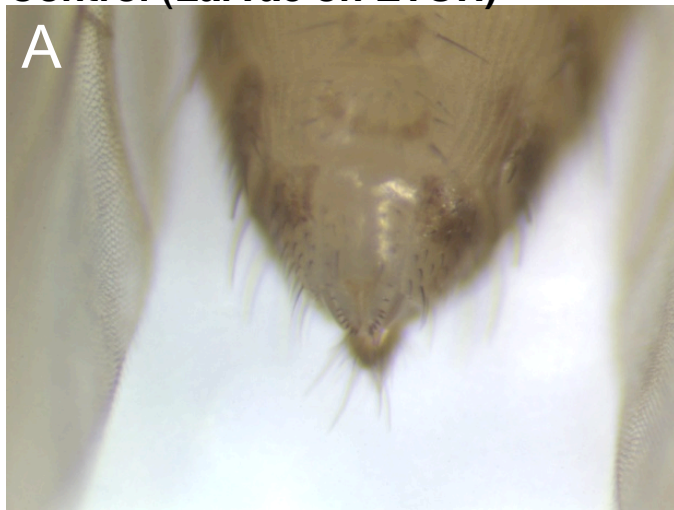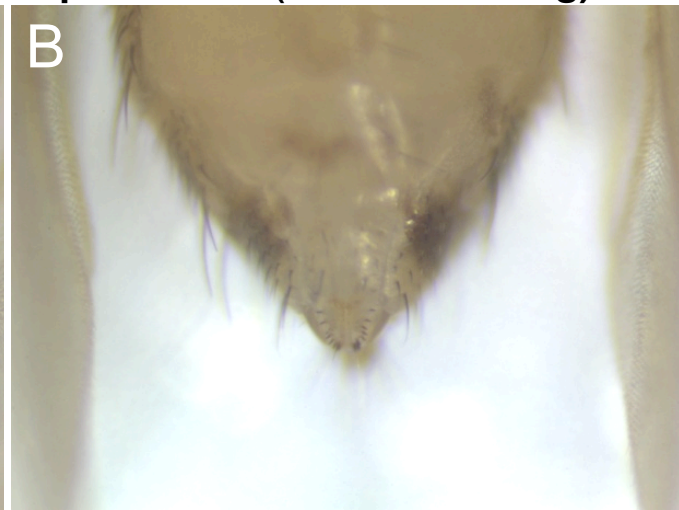

**Male**

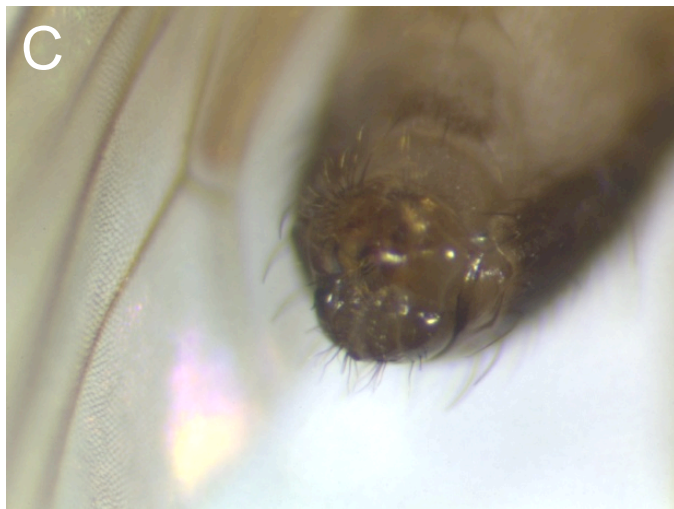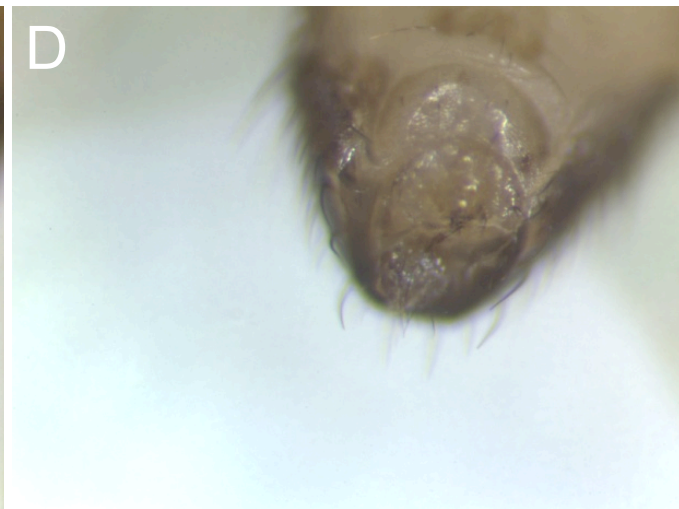

**Male**

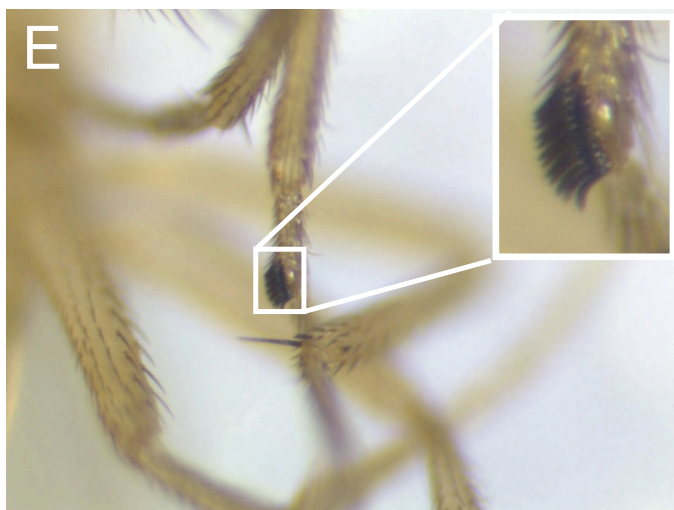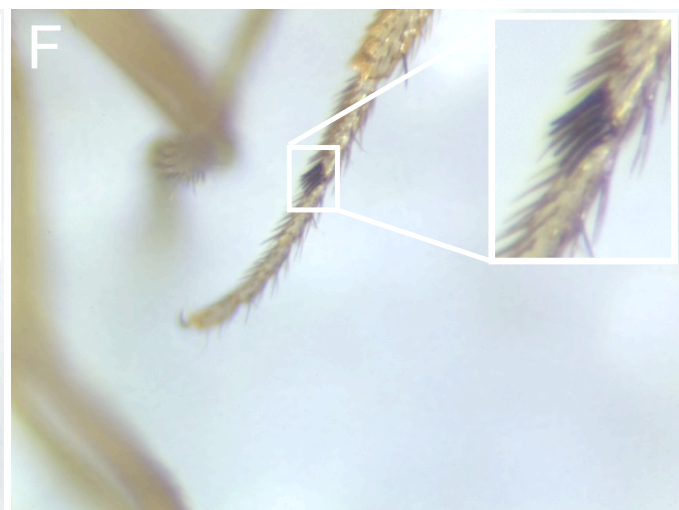

Supplement: MOESM4 [file 9441364]
